# Supplementary material for: Recombinant Production, NMR Solution Structure, and Membrane Interaction of the Phα1β Toxin, a TRPA1 Modulator from the Brazilian Armed Spider Phoneutria nigriventer
Source: MDPI journal article supplement (doi:10.3390/toxins15060378), 2023-06-03
Supplement: s1 [file s1]

**Recombinant production, NMR solution structure, and membrane interaction of the Ph $\alpha$ 1 $\beta$  toxin, a TRPA1 modulator from the Brazilian armed spider *Phoneutria nigriventer***

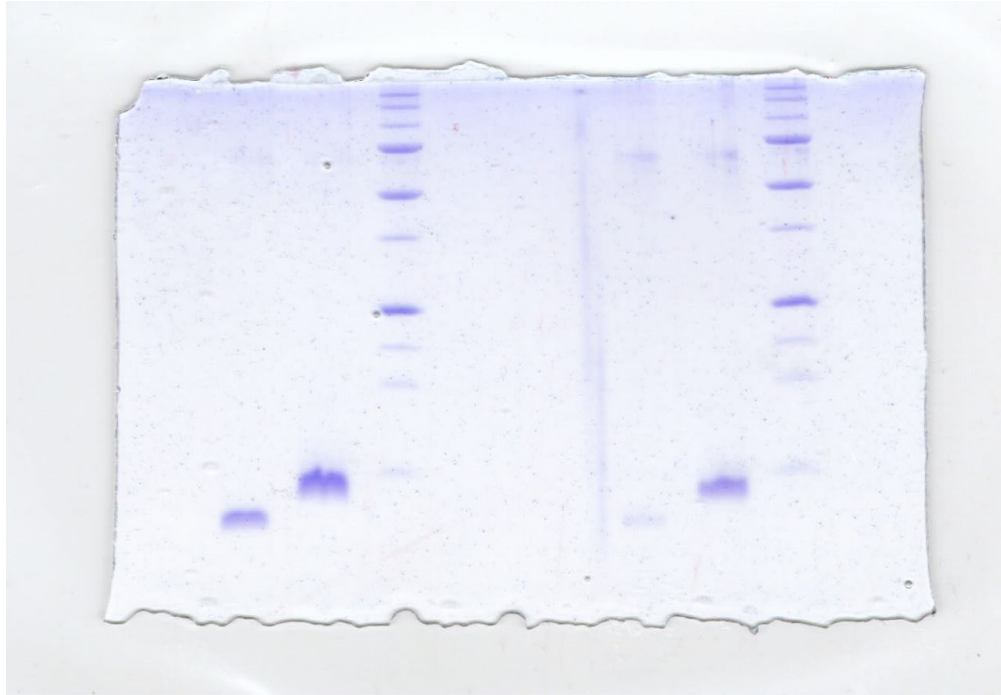

**Figure S1.** Full SDS-PAGE gel used for analysis of the purified Ph $\alpha$ 1 $\beta$  (MW ~ 6 KDa). Agitoxin-2 (MW ~ 4 KDa) was used as a low molecular weight reference protein. The labels of the lanes and MW markers are shown in Figure 2B in the manuscript. Repeating lines were used to select the optimal concentration of toxins.

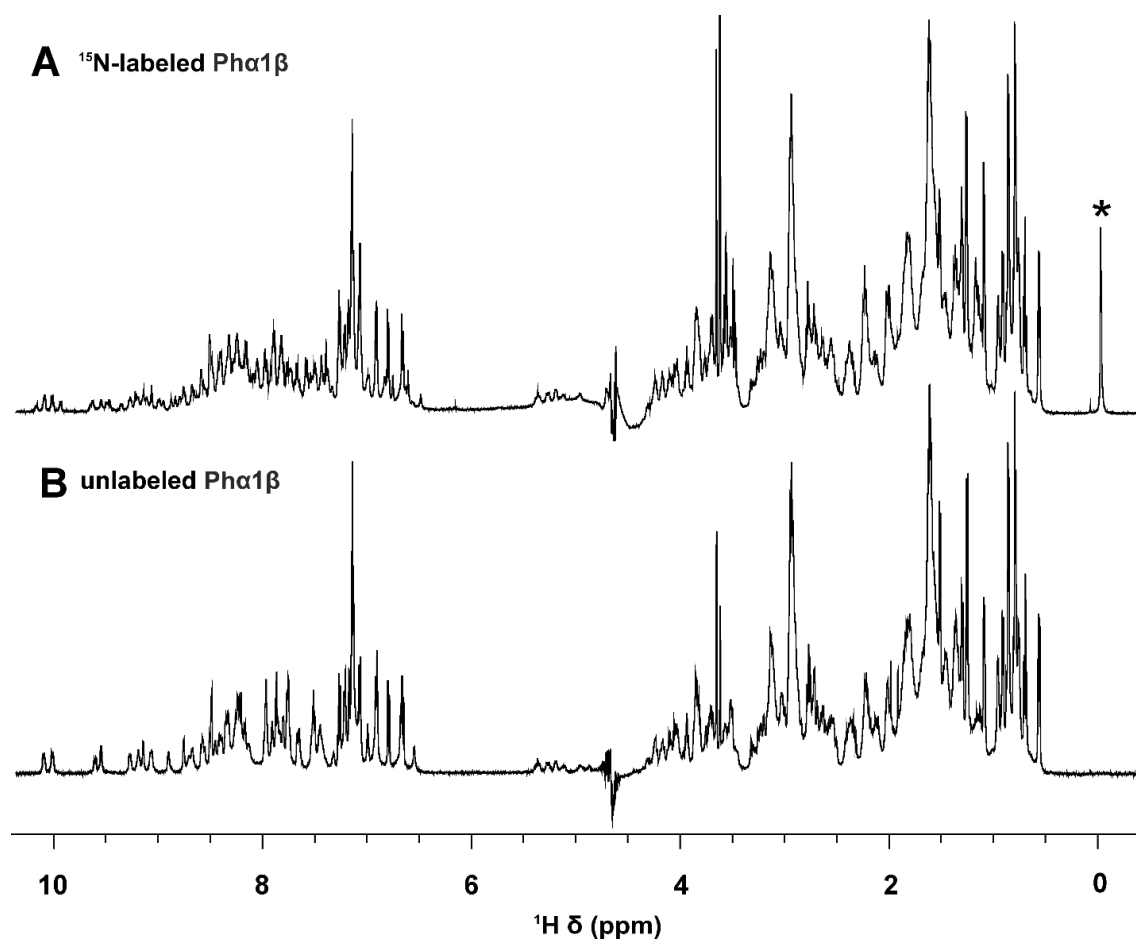

**Figure S2.** 1D  $^1\text{H}$  NMR spectra of **(A)**  $^{15}\text{N}$  labeled and **(B)** unlabeled recombinant analogues of  $\text{Ph}\alpha 1\beta$  (30  $^\circ\text{C}$ , pH 4.5). An impurity containing  $\text{Si-CH}_3$ , probably originating from the C4 phase of the HPLC column, is marked with an asterisk.

Shenk\_001\_20230518\_ZR\_Pha16  
100um Inertsil 1.9 pulled-emitter  
RT: 0.00 - 34.97

05/19/23 00:09:06

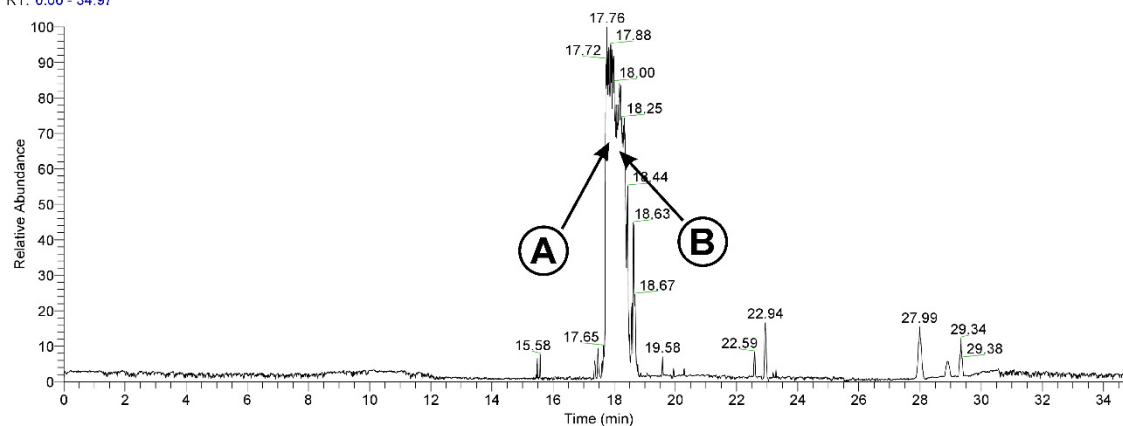

Shenk\_001\_20230518\_ZR\_Pha16 #1789-1836 RT: 17.69-18.12 AV: 48 NL: 3.22E8  
T: FTMS + p NSI Full ms [500.0000-2000.0000]

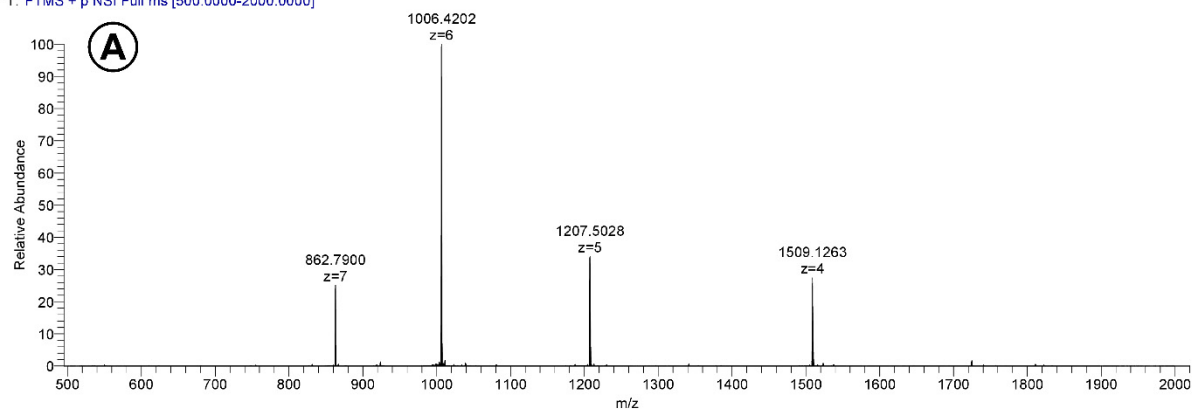

Shenk\_001\_20230518\_ZR\_Pha16 #1840-1853 RT: 18.16-18.28 AV: 14 NL: 3.06E8  
T: FTMS + p NSI Full ms [500.0000-2000.0000]

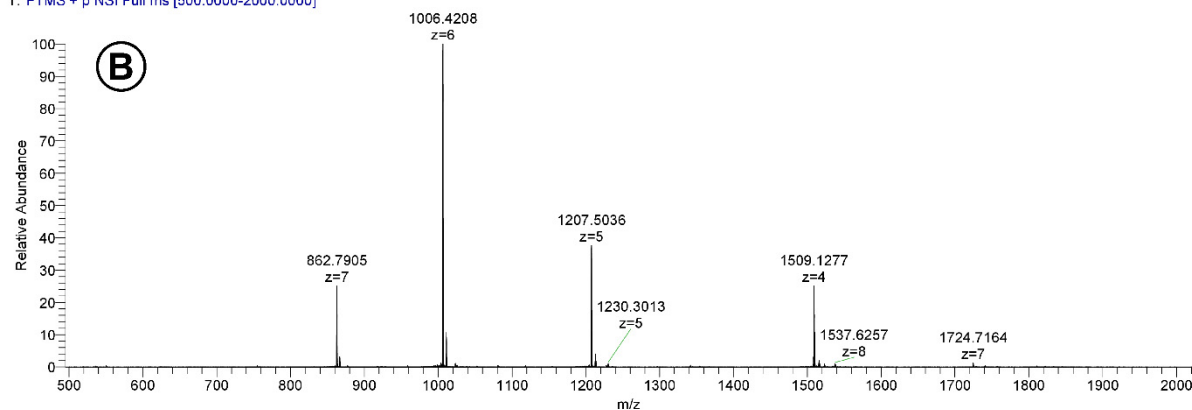

**Figure S3.** LC-MS analysis of the recombinant Pha1 $\beta$  protein. (top) Reverse-phase (C18) chromatography profile obtained on Ultimate 3000 Nano LC System (Thermo Fisher Scientific). Note, significant overswing in intensity for the two major peaks. (bottom) MS spectra of two major LC peaks measured at Q Exactive Plus Orbitrap mass spectrometer (Thermo Fisher Scientific). Both peaks correspond to the same compound.

**A**  $^1\text{H}$ - $^1\text{H}$  TOCSY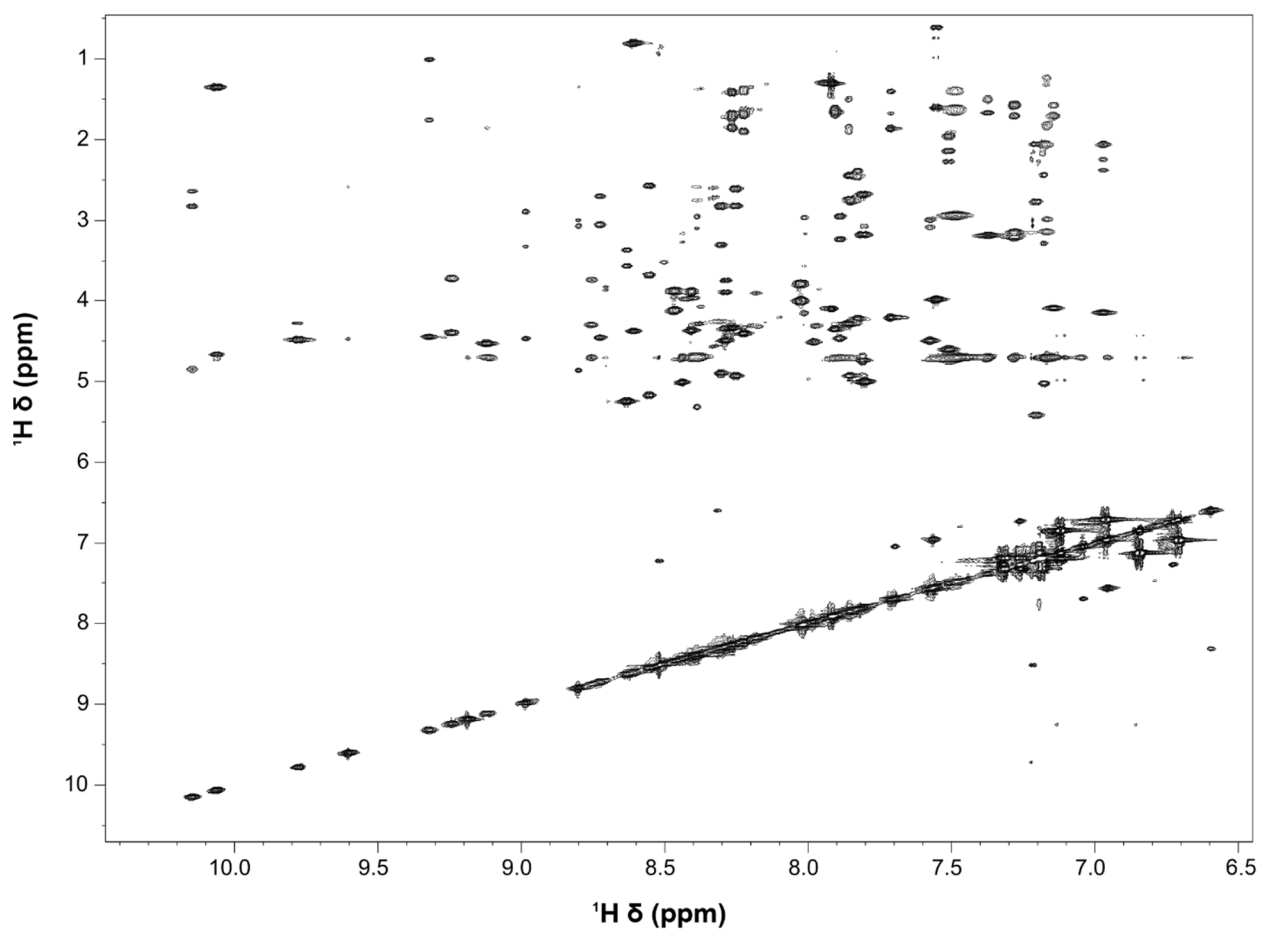**B**  $^1\text{H}$ - $^1\text{H}$  NOESY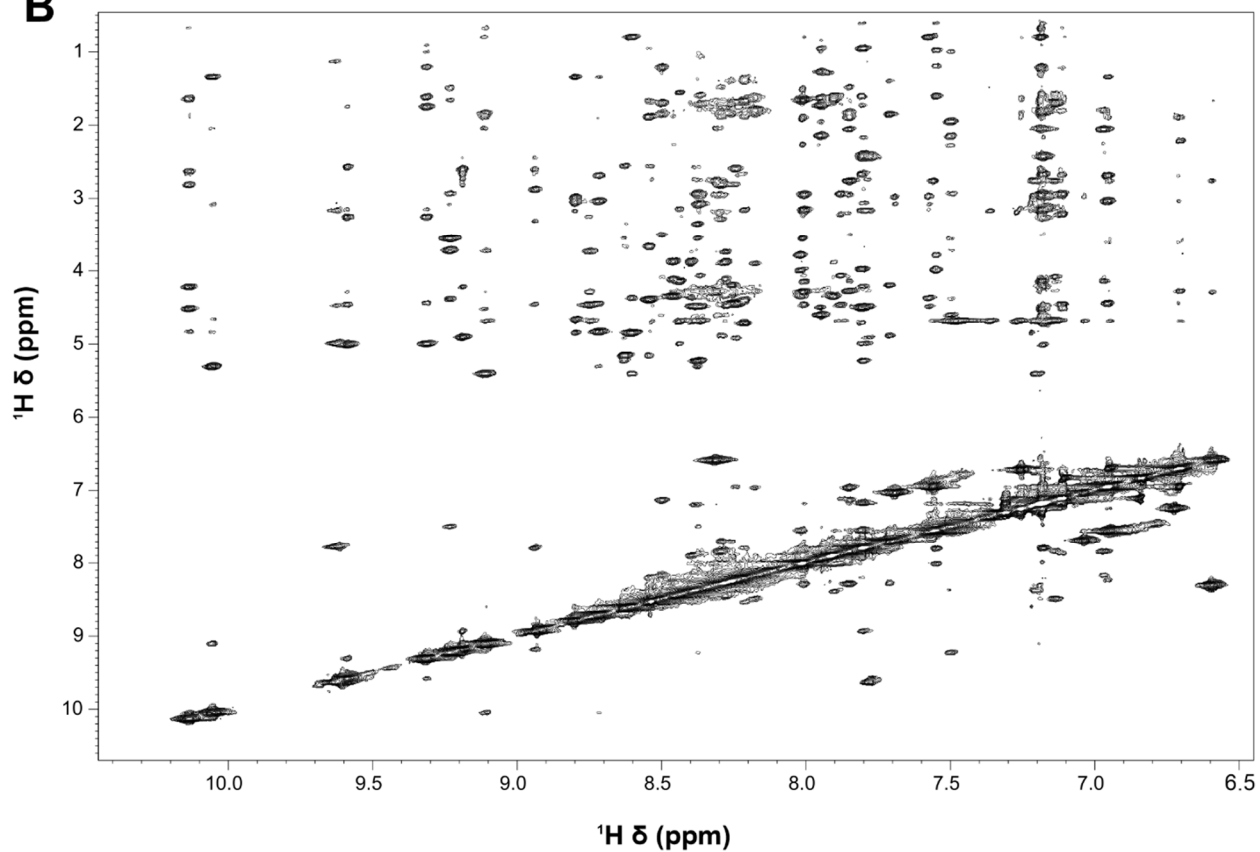

**Figure S4.** 2D NMR spectra of unlabeled recombinant Ph $\alpha$ 1 $\beta$ . **(A)**  $^1\text{H}$ - $^1\text{H}$  TOCSY ( $\tau_m = 60$  ms) and **(B)**  $^1\text{H}$ - $^1\text{H}$  NOESY ( $\tau_m = 100$  ms) at 30 °C, pH 4.5.

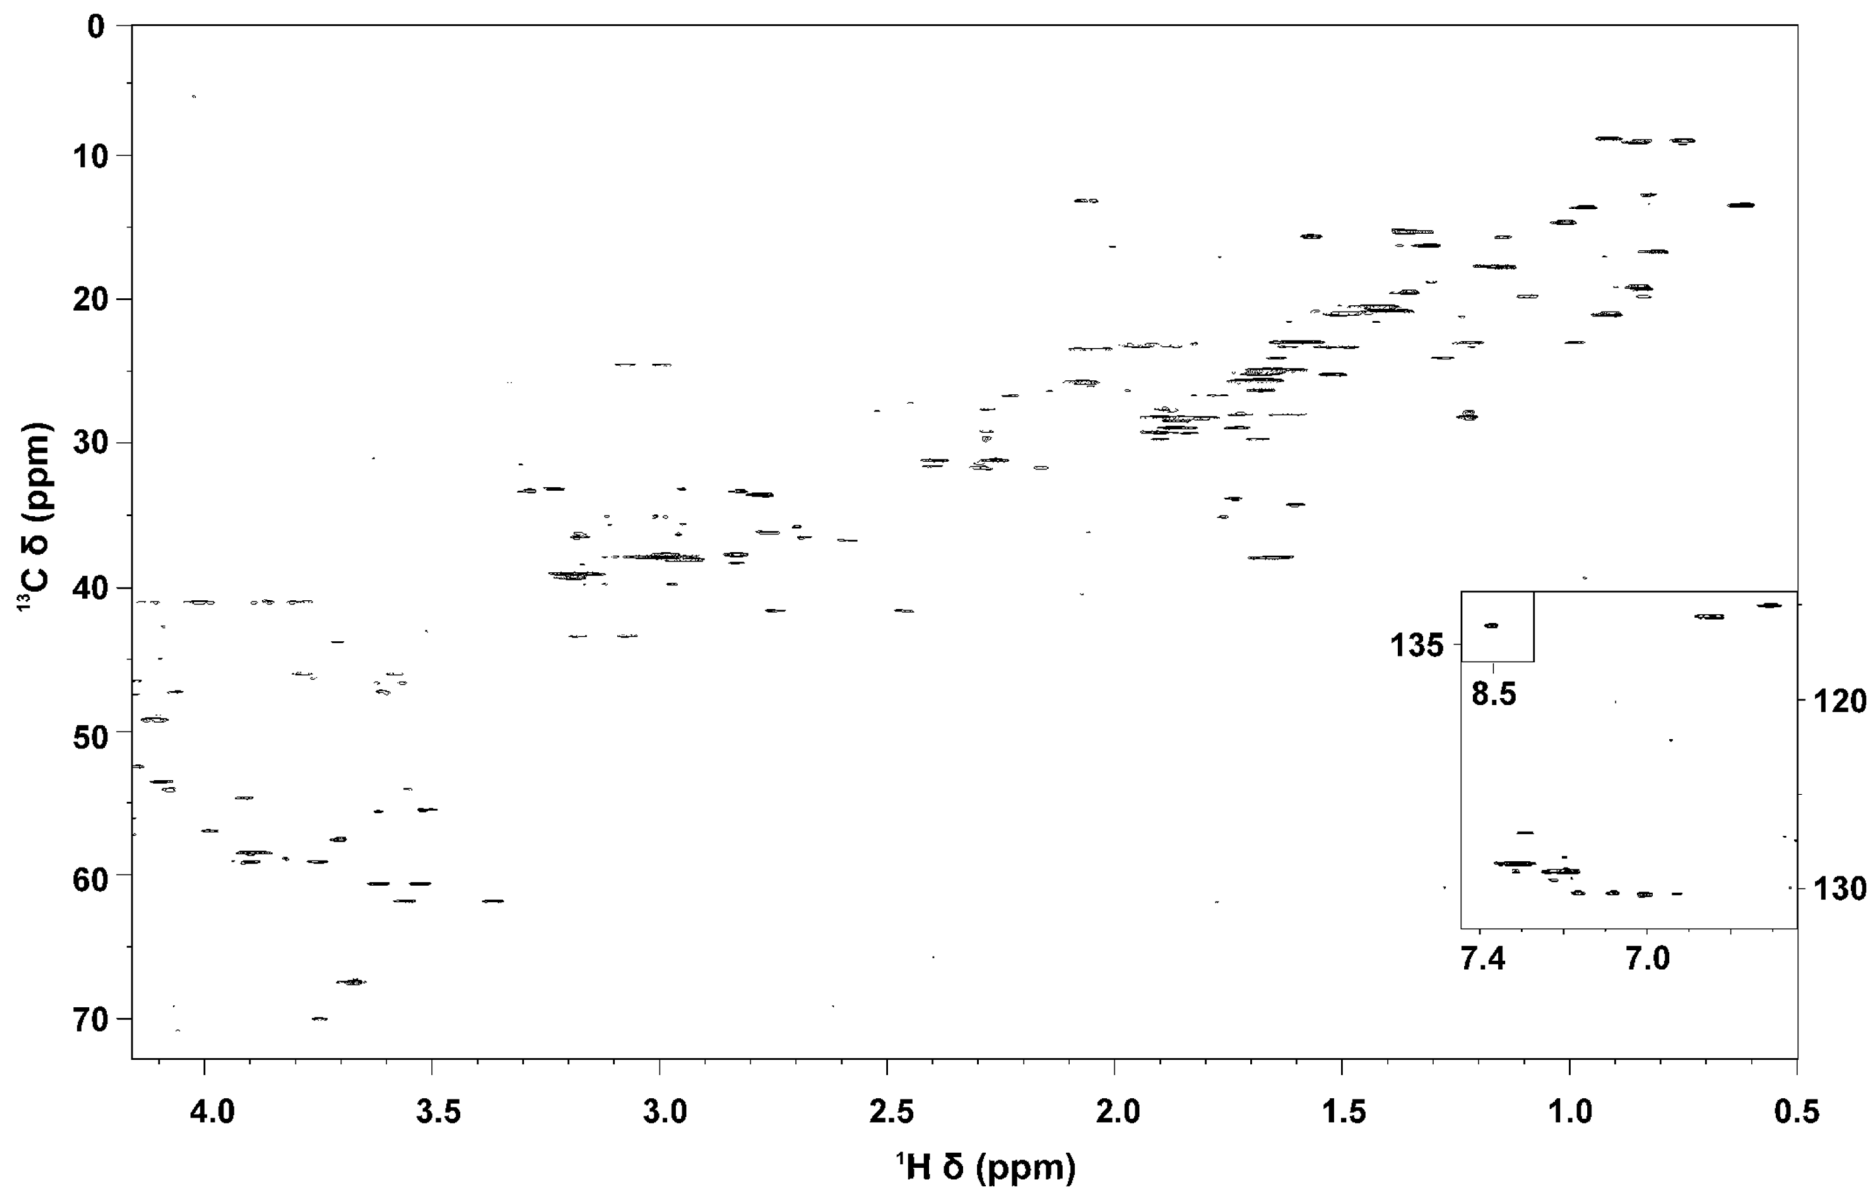

**Figure S5.** 2D  $^1\text{H}$ - $^{13}\text{C}$  HSQC NMR spectrum of Ph $\alpha$ 1 $\beta$  (30  $^{\circ}\text{C}$ , pH 4.5).

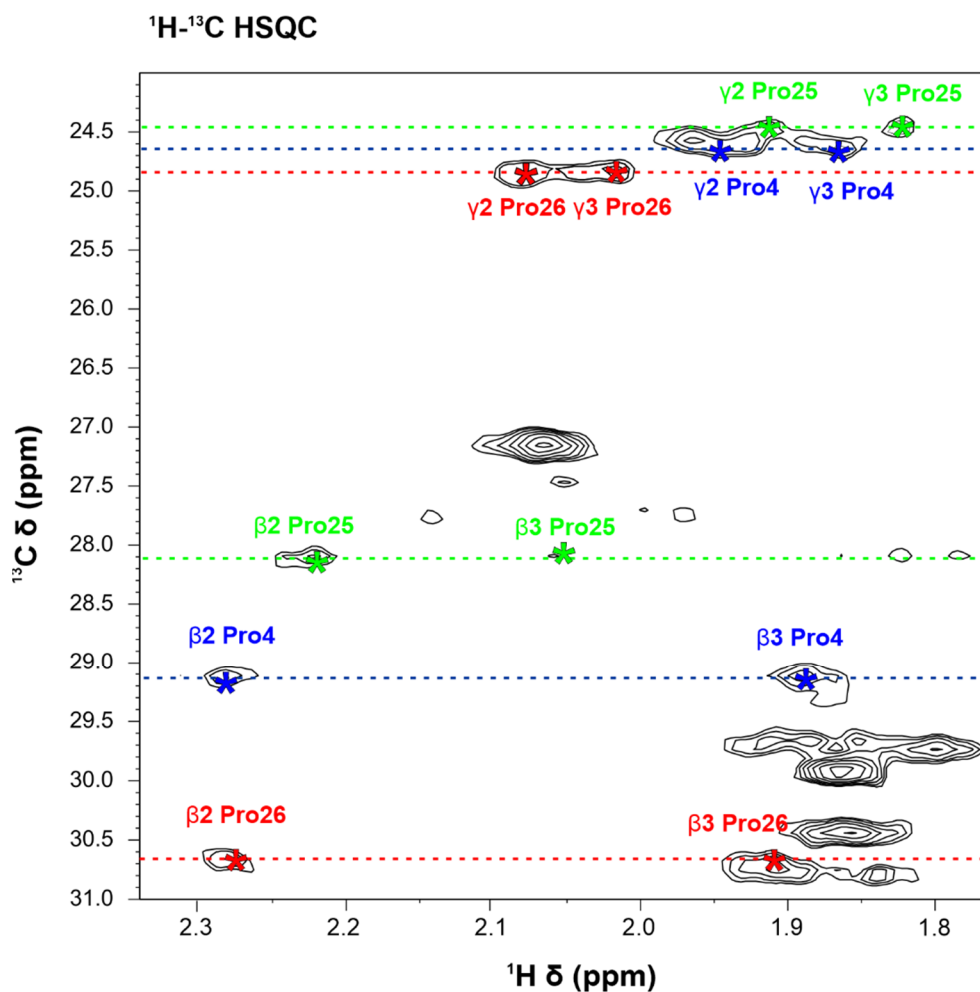

**Figure S6.** The fragment of 2D  $^1\text{H}$ - $^{13}\text{C}$  HSQC spectrum of Ph $\alpha$ 1 $\beta$  with  $\text{HC}^\beta$  and  $\text{HC}^\gamma$  resonances of prolines (30  $^\circ\text{C}$ , pH 4.5). Pro4, Pro25, and Pro26 signals are highlighted by blue, green, and red colors, respectively. The resonance frequencies of  $\text{C}^\beta$  and  $\text{C}^\gamma$  signals are marked by dotted lines. The cross-peaks are shown by asterisks and are colored according to the color of the spin system.

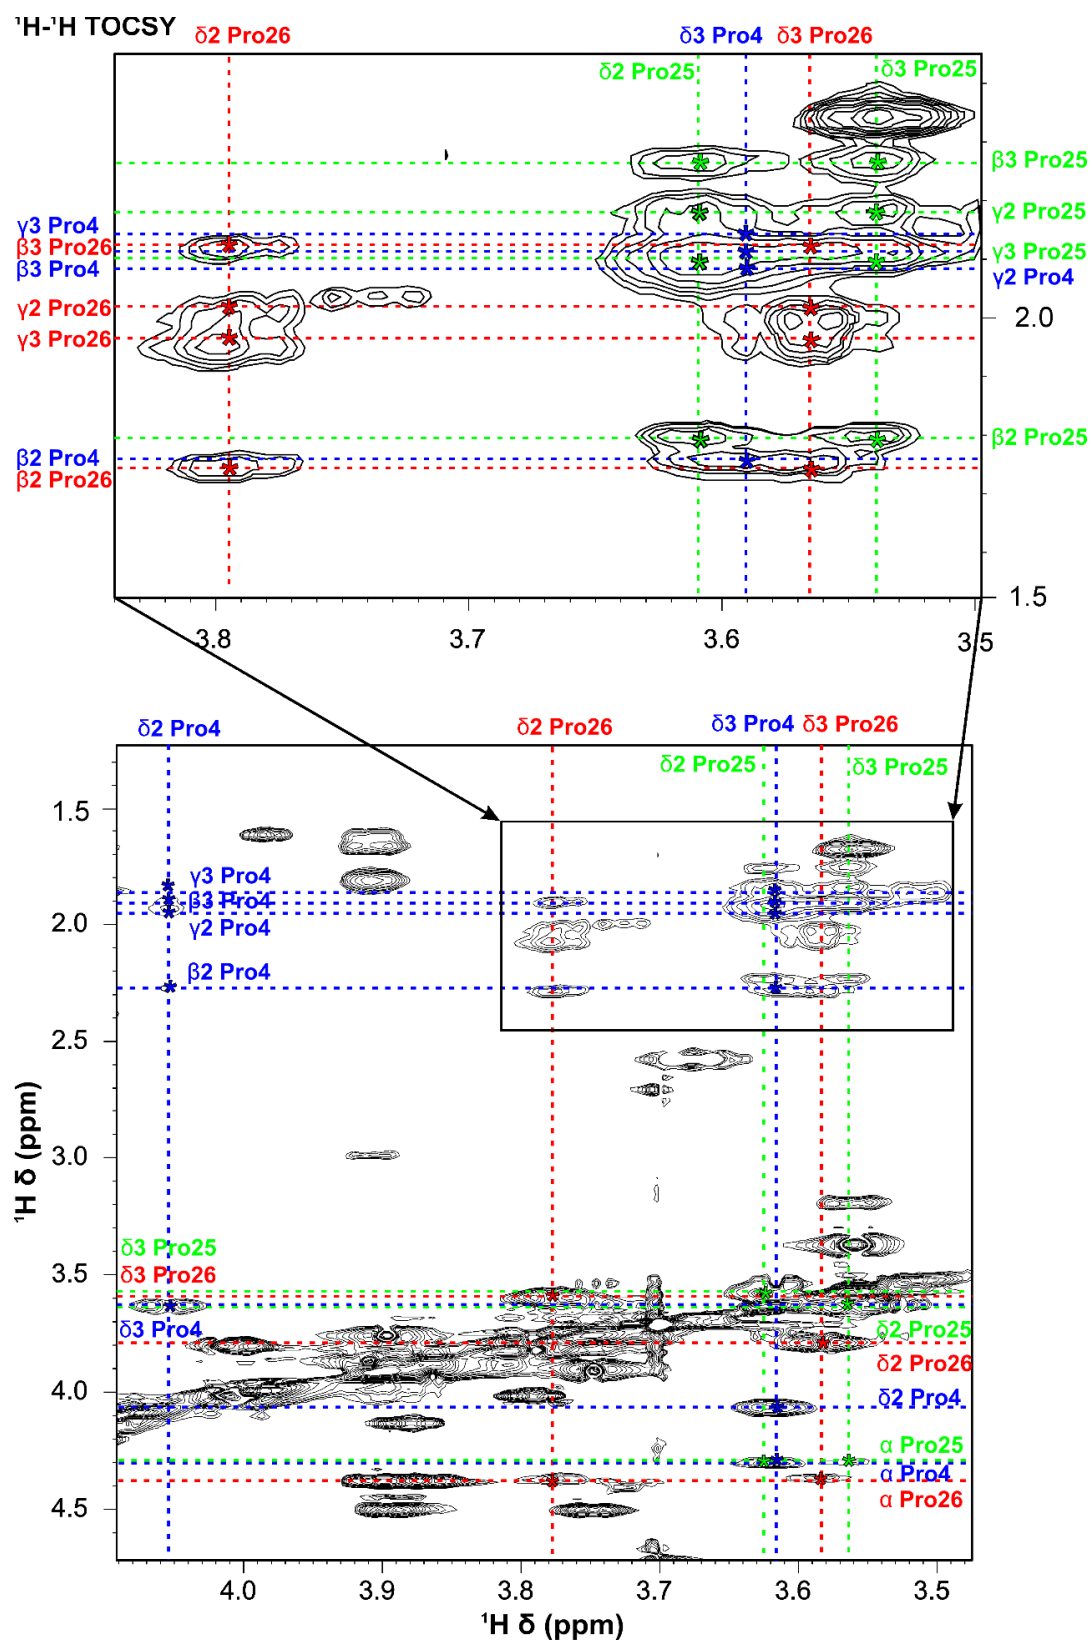

**Figure S7.** The fragment of 2D  $^1\text{H}$ - $^1\text{H}$  TOCSY spectrum ( $\tau_m = 60$  ms) of Ph $\alpha 1\beta$  with  $\text{H}^\delta$  Pro signals (30  $^\circ\text{C}$ , pH 4.5). Pro4, Pro25, and Pro26 signals are highlighted by blue, green, and red colors, respectively. The resonance frequencies of signals are marked by dotted lines. The cross-peaks are shown by asterisks and are colored according to the color of the spin system.

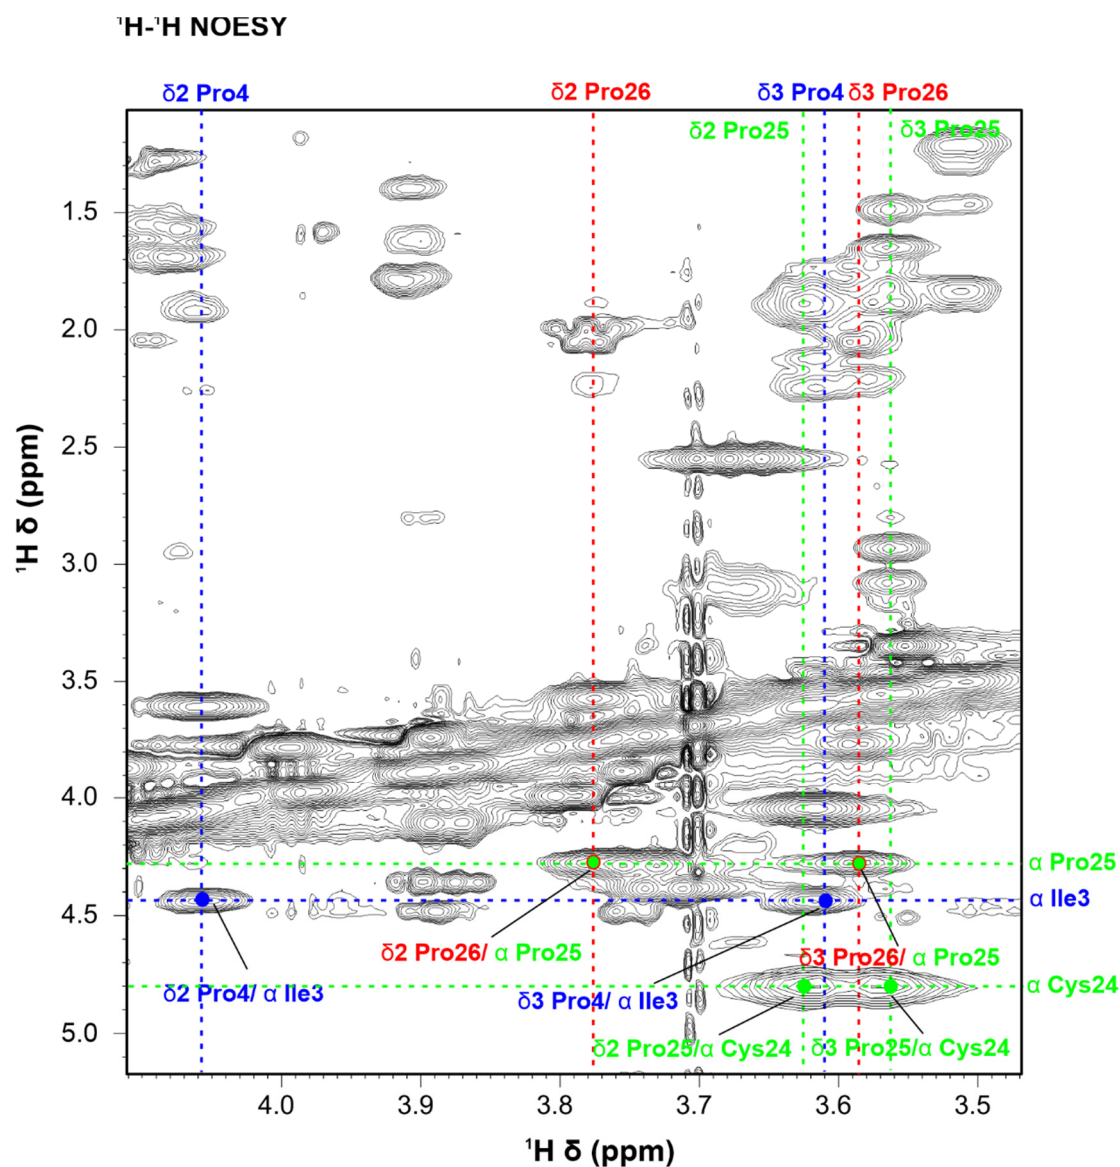

**Figure S8.** The fragment of 2D  $^1\text{H}$ - $^1\text{H}$  NOESY spectrum ( $\tau_m = 100$  ms) of Pha1 $\beta$  with  $\text{H}^\alpha$  -  $\text{H}^\beta$  cross-peaks for Xxx-Pro dipeptides (30  $^\circ\text{C}$ , pH 4.5). Pro4, Pro25, and Pro26 signals are highlighted by blue, green, and red colors, respectively. The NOE contacts are shown by points and are colored according to the color of the spin system.



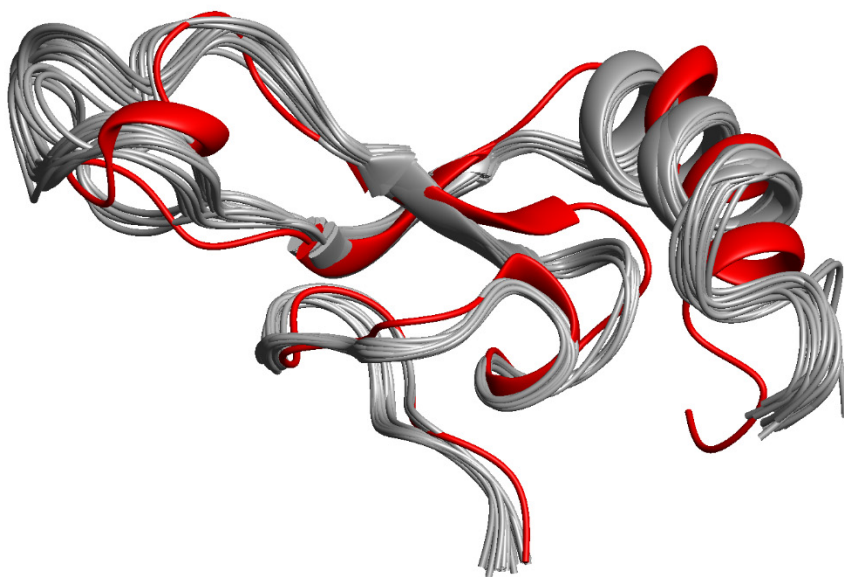

**Figure S9.** The comparison of experimentally determined Ph $\alpha$ 1 $\beta$  structure (gray, 20 models) with the model predicted by AlphaFold 2.0 (red). The structures are superimposed by heavy atoms of Cys residues.

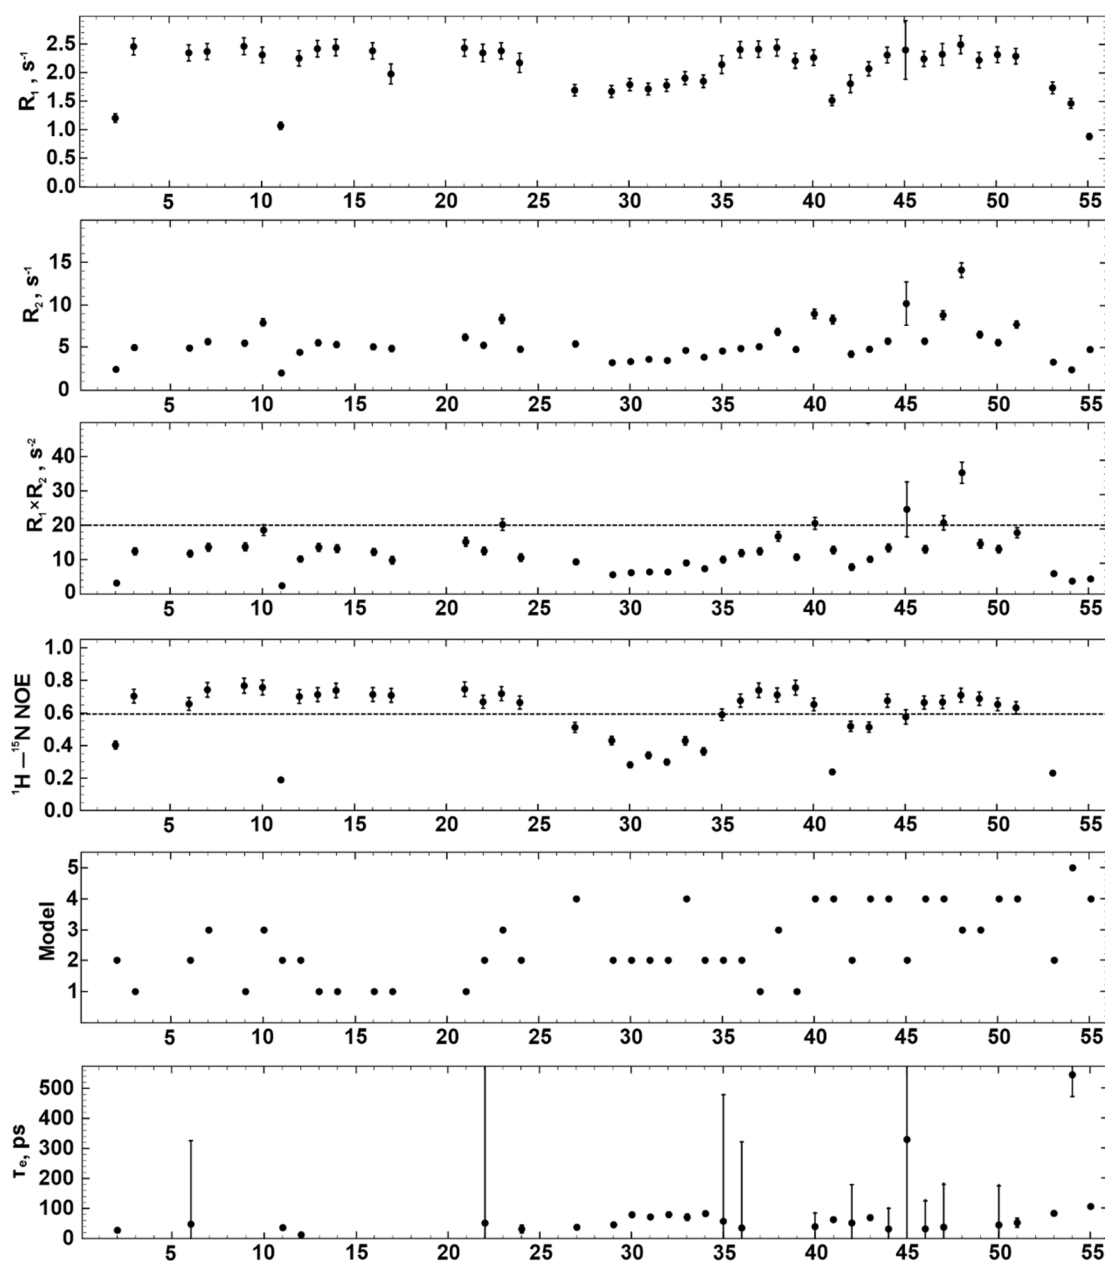

**Figure S10.**  $^{15}\text{N}$  relaxation data for Ph $\alpha$ 1 $\beta$  (60 MHz, pH 5.3, 30°C) and results of the ‘model-free’ analysis.  $R_1$  and  $R_2$  – the values of longitudinal and transverse  $^{15}\text{N}$  relaxation rates.  $^{15}\text{N}$ - $\{^1\text{H}\}$ -NOE - steady-state heteronuclear NOE. Model – the number of relaxation model assigned by the FastModelFree software.  $\tau_e$  – effective correlation time for ps and ns backbone motions. The NOE threshold of 0.6 defines the sites of high amplitude ps-ns mobility. Residues displaying  $R_1 \times R_2 > 20 \text{ s}^{-2}$  [66] are subjected to exchange fluctuations in  $\mu\text{s}$ -ms timescale.



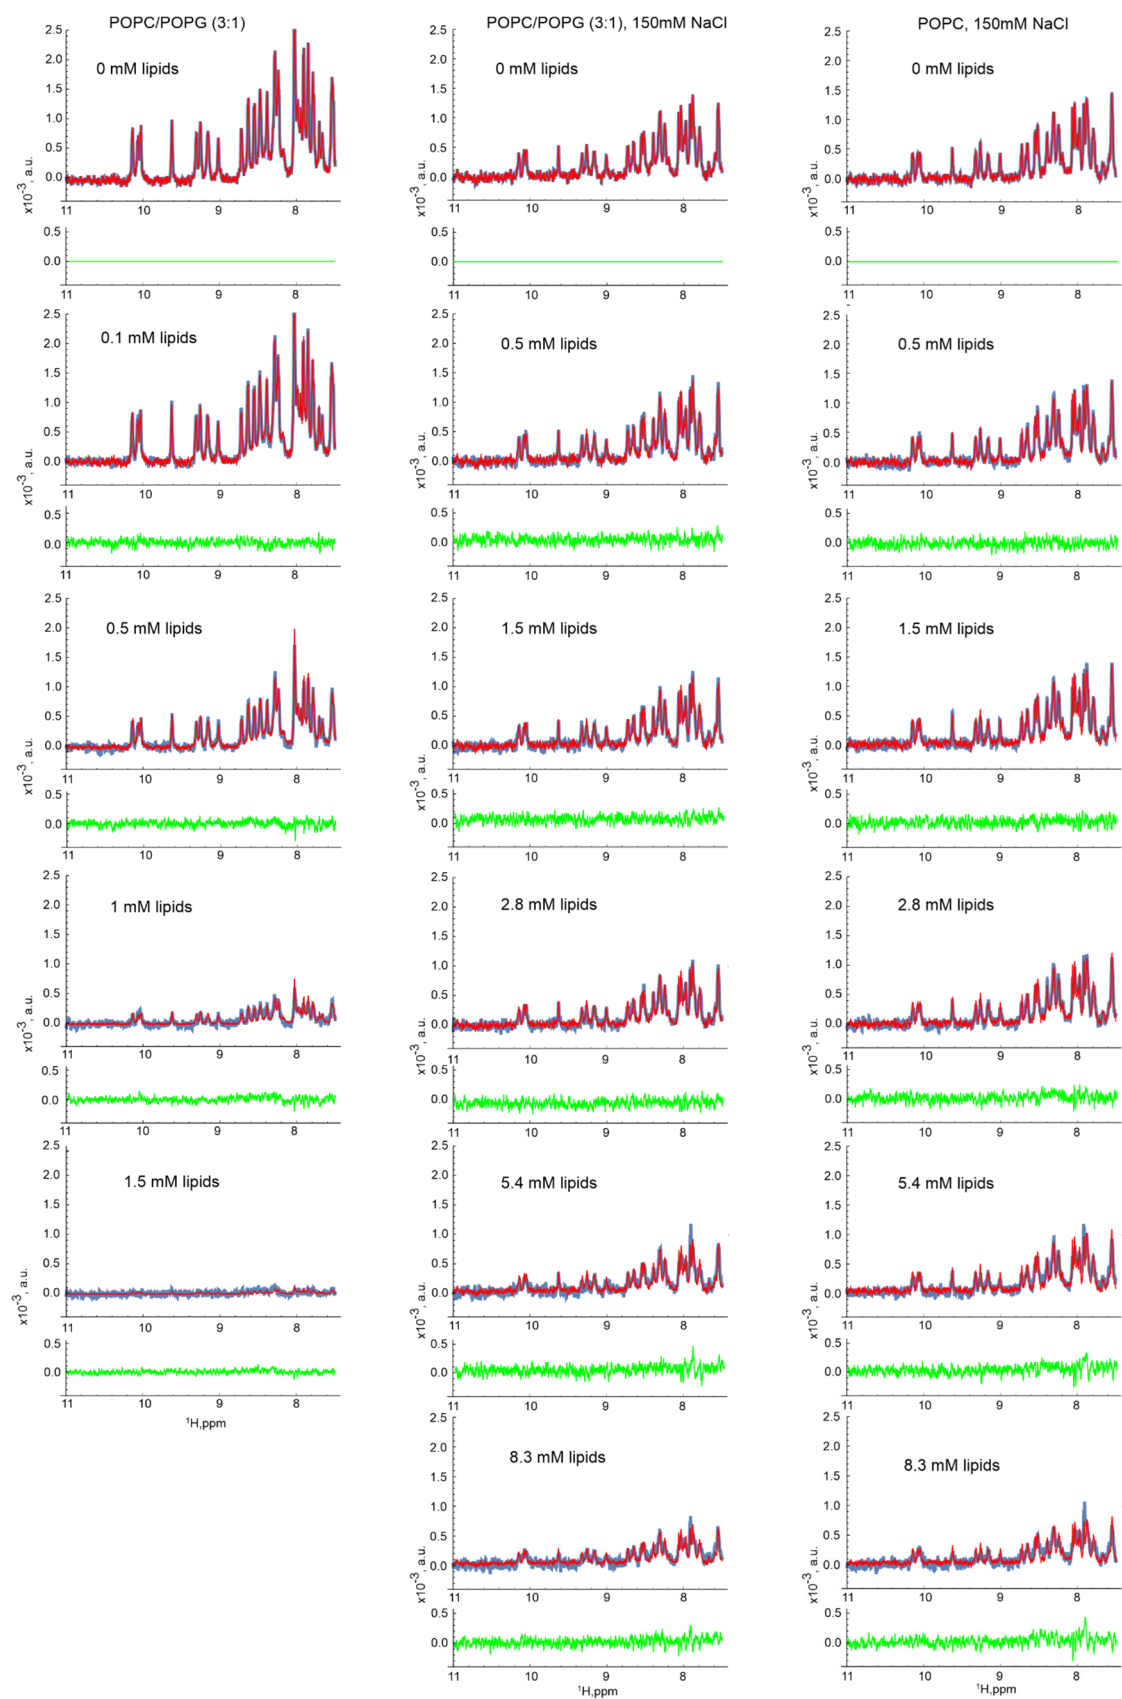

**Figure S12.** Approximation of the 1D  $^1\text{H}$  NMR spectra of Pha1 $\beta$  measured in the presence of lipids (blue) by intensity scaled spectrum of the toxin in aqueous solution (red). Sample compositions are shown in the figure above the corresponding columns. The differences between the “blue” and “red” spectra (residuals) are shown by green.

**Table S1.** Statistics for the best CYANA structures of Ph $\alpha$ 1 $\beta$ .

| <b>Distance and angle restraints</b>                       |                 |
|------------------------------------------------------------|-----------------|
| Total NOE contacts                                         | 384             |
| Intraresidual                                              | 115             |
| Sequential ( $ i - j  = 1$ )                               | 170             |
| Medium range ( $1 <  i - j  < 4$ )                         | 49              |
| Long range ( $ i - j  > 4$ )                               | 53              |
| Hydrogen bond restraints (bonds/upper/lower)               | 17/34/34        |
| S-S bond restraints (bonds/upper/lower)                    | 6/18/18         |
| Torsion angle restraints                                   | 78              |
| Angle $\varphi$                                            | 43              |
| Angle $\chi_1$                                             | 35              |
| Total restraints/per residue                               | 666/12.1        |
| <b>Statistics for calculated structures</b>                |                 |
| Structures calculated/selected                             | 200/20          |
| CYANA target function ( $\text{\AA}^2$ )                   | 1.2 $\pm$ 0.07  |
| Violations of restraints                                   |                 |
| Distance ( $> 0.2 \text{ \AA}$ )                           | 0               |
| Dihedral angles ( $> 1^\circ$ )                            | 0               |
| r.m.s.d. ( $\text{\AA}$ ) for stable regions (2-26, 35-54) |                 |
| Backbone                                                   | 0.46 $\pm$ 0.19 |
| Heavy atoms                                                | 1.02 $\pm$ 0.27 |
| r.m.s.d. ( $\text{\AA}$ ) overall                          |                 |
| Backbone                                                   | 0.89 $\pm$ 0.37 |
| Heavy atoms                                                | 1.46 $\pm$ 0.53 |

r.m.s.d. – root mean square deviation.

**Table S2.** Residuals after least-squares fit of 1D  $^1\text{H}$  NMR spectra of Ph $\alpha$ 1 $\beta$  in the presence of lipids by scaled Ph $\alpha$ 1 $\beta$  spectrum in water. For each fit, the standard deviation of residual (11-7.5ppm) and standard deviation of noise region (11-10.4ppm) of corresponding spectrum in lipids are shown. ( $\times 10^{-5}$ , a.u.).

| # spect. | POPC:POPG 0mM NaCl   |             |                      | POPC:POPG 150mM NaCl |             |                    | POPC 150mM NaCl      |             |                    |
|----------|----------------------|-------------|----------------------|----------------------|-------------|--------------------|----------------------|-------------|--------------------|
|          | C lipids,<br>x0.6,mM | SD<br>Noise | SD Fit re-<br>sidual | C lipids,<br>x0.6,mM | SD<br>Noise | SD Fit<br>residual | C lipids,<br>x0.6,mM | SD<br>Noise | SD Fit<br>residual |
| 1        | 0.0                  | 3.5         | 0.0                  | 0.0                  | 4.5         | 0.0                | 0.0                  | 3.9         | 0.0                |
| 2        | 0.1                  | 3.3         | 5.0                  | 0.5                  | 4.3         | 6.1                | 0.5                  | 4.4         | 5.9                |
| 3        | 0.5                  | 4.1         | 4.8                  | 1.5                  | 4.0         | 6.0                | 1.5                  | 4.5         | 6.2                |
| 4        | 1.0                  | 3.6         | 4.4                  | 2.8                  | 4.4         | 5.9                | 2.8                  | 4.7         | 6.4                |
| 5        | 1.5                  | 2.6         | 3.0                  | 5.4                  | 5.2         | 7.1                | 5.4                  | 3.7         | 7.4                |
| 6        | -                    | -           | -                    | 8.3                  | 4.7         | 6.3                | 8.3                  | 4.5         | 7.5                |
